# Supplementary material for: Bis(pentalene)dititanium chemistry: C–H, C–X and H–H bond activation
Source: Royal Society of Chemistry journal article supplement (doi:10.1039/c8dt02654h), 2018-01-01
Supplement: c8dt02654h1.pdf [file c8dt02654h1.pdf]

## Supplementary Information

### **Bis(pentalene)ditanium Chemistry: C-H, C-X and H-H Bond Activation**

Nikolaos Tsoureas<sup>1</sup>, Jennifer C. Green<sup>2</sup>, and F. Geoffrey N. Cloke<sup>1\*</sup>

<sup>1</sup>School of Life Sciences, Department of Chemistry, University of Sussex, Falmer, Brighton, BN1 9QJ, United Kingdom. <sup>2</sup> Department of Chemistry, University of Oxford, Inorganic Chemistry Laboratory, South Parks Road, Oxford OX1 3QR, United Kingdom.

**General considerations:** All manipulations were carried out in a MBraun glovebox under N<sub>2</sub> or Ar (O<sub>2</sub> and H<sub>2</sub>O <1 ppm) or by using standard Schlenk techniques under Ar (BOC pureshield) passed through a column containing BASF R3-11(G) catalyst and activated molecular sieves (4 Å). All glassware was dried at 160 °C overnight prior to use. Filter cannulas were prepared using Whatman 25 mm glass microfiber filters and were pre-dried at 160 °C overnight. Toluene was dried over molten K, distilled under a N<sub>2</sub> atmosphere and kept in a Young's ampules over a potassium mirror under Ar. Hydrocarbons were dried over NaK, distilled under a N<sub>2</sub> atmosphere, and kept in Young's ampules over a potassium mirror under Ar. Et<sub>2</sub>O was dried over NaK, distilled under a N<sub>2</sub> atmosphere, and kept in Young's ampules over activated molecular sieves (4 Å) under Ar. Deuterated toluene, benzene were degassed by three freeze–thaw cycles, dried by refluxing over molten K for 3 days, vacuum distilled, and kept in Young's ampoules in the glovebox under N<sub>2</sub>. (1)<sup>i</sup> and (3)<sup>ii</sup> were prepared according to a published procedure and stored in a glovebox freezer (-35 °C) under N<sub>2</sub>. Samples of (4) or (4-D) were prepared *in-situ* prior to use according to a published procedure.<sup>ii</sup> <sup>1</sup>BuCCD was prepared according to a published procedure and was vacuum transferred into an ampoule containing activated 4 Å molecular sieves and freeze-thaw-degassed three times prior to use.<sup>iii</sup> 2,6-lutidine and 2,6-Cl<sub>2</sub>-pyridine were purchased from commercial suppliers; the former was freeze-thaw-degassed three times prior to use and stored over activated molecular sieves overnight, while the latter was kept in a N<sub>2</sub> glovebox and used as received. HCl 2.0 M in Et<sub>2</sub>O was purchased by Sigma-Aldrich in a SureSeal bottle and was stored in a Young's ampule at 5 °C. <sup>1</sup>H-NMR, <sup>13</sup>C{<sup>1</sup>H}-NMR, DEPT135, <sup>29</sup>Si{<sup>1</sup>H}-NMR, deuterium spectra, correlation experiments, and variable temperature experiments were recorded on a Varian VNMR S400 spectrometer operating at 400 MHz (<sup>1</sup>H) at 30 °C unless otherwise stated. The spectra were referenced internally to the residual protic solvent (<sup>1</sup>H) or the signals of the solvent (<sup>13</sup>C). <sup>29</sup>Si{<sup>1</sup>H} NMR spectra were referenced externally relative to SiMe<sub>4</sub>. EI-MS mass spectra were recorded on a VG-Autospec Fisons instrument at the University of Sussex unless otherwise stated. IR spectra were recorded on a Perkin Elmer 100 instrument as thin films. Elemental analyses were performed by MicroAnalytisches Labor Pascher.

**Preparation of (5):** In an Ar filled glovebox 50 mg (0.053 mmol) of (2) were dissolved in n-pentane (*ca* 10 mL) in a Young's ampoule with vigorous stirring. The crimson red solution was treated with 4.4 µL (1.02 mol eq) of pyridine and immediate color change to brown occurred. Volatiles were removed to give a brown residue which was thoroughly dried. It was then dissolved in the minimum amount of n-pentane (*ca* 1 mL) and let to slowly evaporate to *ca* half in an Ar glovebox to start crystallization, before placing in a -35 °C freezer overnight. The light brown crystals (suitable for single crystal XRD) were removed from the mother-liquor *via* a drawn-out pipette. Yield: 20 mg (38%)

**Preparation of (6):** In a N<sub>2</sub> filled glovebox a Young's NMR tube was charged with 31 mg (0.033 mmol) of (1) and 5 mg (1 mol eq) of 2,6-Cl<sub>2</sub>-pyridine. C<sub>6</sub>D<sub>6</sub> was added to the two solids to produce a bright red solution which proved to be (6) by NMR spectroscopy in 100% spectroscopic yield. Volatiles were removed in vacuum and the red microcrystalline material was extracted in the minimum amount of pentane (*ca* 2 ml) filtered and cooled in a glovebox freezer (-35 °C) to yield the title compound as crystals suitable for XRD. Yield: 25 mg (69.5 %) <sup>1</sup>H-NMR δ(C<sub>6</sub>D<sub>6</sub>): 10.02 (1H, d, <sup>3</sup>J<sub>HH</sub> = 7.01 Hz, pyH), 7.91, (1H, d, <sup>3</sup>J<sub>HH</sub> = 3.11 Hz, PnH), 7.87 (1H, d, <sup>3</sup>J<sub>HH</sub> = 2.73 Hz, PnH), 7.27 (1H, d, <sup>3</sup>J<sub>HH</sub> = 3.50 Hz, PnH), 6.88 (1H, d, <sup>3</sup>J<sub>HH</sub> = 3.11 Hz, PnH), 6.82 (1H, d, <sup>3</sup>J<sub>HH</sub> = 7.79 Hz, pyH) 6.75 (1H, dd, <sup>3</sup>J<sub>HH</sub> = 7.79 Hz, <sup>3</sup>J<sub>HH</sub> = 7.40 Hz, pyH), 6.64 (1H, d, <sup>3</sup>J<sub>HH</sub> = 3.50 Hz, PnH), 6.04 (1H, d, <sup>3</sup>J<sub>HH</sub> = 2.73 Hz, PnH), 5.74 (1H, d, <sup>3</sup>J<sub>HH</sub> = 3.11 Hz, PnH), 5.67 (1H, d, <sup>3</sup>J<sub>HH</sub> =

3.11 Hz, PnH), 1.55-1.66 (12H, m, CH(CH<sub>3</sub>)<sub>3</sub>), 1.28 (11H, d, <sup>3</sup>J<sub>HH</sub> = 7.40 Hz, CH(CH<sub>3</sub>)<sub>3</sub>), 1.23 (16H, d, <sup>3</sup>J<sub>HH</sub> = 7.40 Hz, CH(CH<sub>3</sub>)<sub>3</sub>), 1.11 (20H, two overlapping d, <sup>3</sup>J<sub>HH</sub> = 5.84 Hz, CH(CH<sub>3</sub>)<sub>3</sub>), 0.98 (11H, d, <sup>3</sup>J<sub>HH</sub> = 7.40 Hz, CH(CH<sub>3</sub>)<sub>3</sub>), 0.88 (16H, dd, J<sub>HH</sub> = 2.72 Hz, <sup>3</sup>J<sub>HH</sub> = 7.40 Hz, CH(CH<sub>3</sub>)<sub>3</sub>); <sup>13</sup>C{<sup>1</sup>H}-NMR δ(C<sub>6</sub>D<sub>6</sub>): 204.7 (q), 157.29(q), 144.40 (CH), 142.07, 138.49 (CH), 137.75 (q), 136.34(CH), 133.32 (CH), 131.63 (CH), 128.68 (CH, obscured by C<sub>6</sub>D<sub>6</sub> but present in DEPT135), 125.99 (q), 123.31 (q), 123.01 (CH), 118.65 (CH), 116.06 (q), 115.37 (CH), 113.91 (CH), 108.91 (CH), 104.29 (q), 103.52 (q), 100.78 (q), 20.50, 20.29, 20.06, 19.80, 19.62, 14.85, 14.72, 13.23, 12.75 (TIPS); <sup>29</sup>Si{<sup>1</sup>H}-NMR δ(C<sub>6</sub>D<sub>6</sub>): 2.20, 2.25, 2.60, 3.73 (Si<sup>i</sup>Pr<sub>3</sub>). Elemental Analysis: Calcd for C<sub>62</sub>H<sub>107</sub>Cl<sub>2</sub>NSi<sub>4</sub>Ti<sub>2</sub> (**6**).C<sub>5</sub>H<sub>12</sub>: C 65.01, H 9.42, N 1.22; Found: C 64.90, H 8.95, N 1.23; No molecular ion could be observed in EI.

**Preparation of (7):** In an Ar filled glovebox 30 mg (0.029 mmol) of (**3**) were dissolved in 0.5-0.7 mL of C<sub>6</sub>D<sub>6</sub> and the resultant pine green solution was treated at RT with 3.5 μL (1 mol eq) of <sup>t</sup>BuCC and the reaction mixture was shaken vigorously to produce a homogeneous deep green solution. After NMR spectroscopy (100% spectroscopic yield), the solution was lyophilised to produce a deep green solid which was extracted in the glovebox with n-pentane (ca 1 mL) and refrigerated overnight (-35 °C) to give the title compound as green needles suitable for single crystal XRD. Yield: 22 mg (ca 69%). <sup>1</sup>H-NMR δ(C<sub>6</sub>D<sub>6</sub>): 7.78 (1H, d, <sup>3</sup>J<sub>HH</sub> = 3.30 Hz, PnH), 7.63 (1H, d, <sup>3</sup>J<sub>HH</sub> = 2.75 Hz, PnH), 7.43 (1H, d, <sup>3</sup>J<sub>HH</sub> = 2.93 Hz, PnH), 6.78 (1H, d, <sup>3</sup>J<sub>HH</sub> = 3.30 Hz, PnH), 6.12 (1H, d, <sup>3</sup>J<sub>HH</sub> = 3.12 Hz, PnH), 6.05 (1H, d, <sup>3</sup>J<sub>HH</sub> = 2.75 Hz, PnH), 5.85 (1H, d, <sup>3</sup>J<sub>HH</sub> = 2.75 Hz, PnH), 5.38 (1H, d, <sup>3</sup>J<sub>HH</sub> = 2.93 Hz, PnH), 4.18 (3H, s, NCH<sub>3</sub>), 2.15-2.09 (4H, m, CH(CH<sub>3</sub>)<sub>2</sub>), 1.68-1.51 (10H, m, CH(CH<sub>3</sub>)<sub>2</sub> and NCH<sub>3</sub>), 1.49-1.51 (17H, m, CH(CH<sub>3</sub>)<sub>2</sub>), 1.37 (9H, s, <sup>t</sup>BuCC), 1.34-1.29 (39H, m, CH(CH<sub>3</sub>)<sub>2</sub>), 1.18-1.00 (23H, m, CH(CH<sub>3</sub>)<sub>2</sub>), -8.83 (1H, s, TiHTi); <sup>13</sup>C{<sup>1</sup>H}-NMR δ(C<sub>6</sub>D<sub>6</sub>): 196.74 (NCN), 135.64 (q), 134.62 (CH Pn), 133.86, 133.10(q), 131.32 (CH, Pn), 129.19 (q), 126.89 (CH, Pn), 126.38 (q), 125.91 (CH, Pn), 125.19 (q), 120.74 (q), 118.75 (q), 116.60 (CH, Pn), 108.28 (CH, Pn), 104.71 (CH, Pn), 102.80 (CH, Pn), 101.57 (q), 100.01 (q), 94.10 (<sup>t</sup>BuCC), 93.12 (<sup>t</sup>BuCC), 39.20 (NCH<sub>3</sub>), 35.00, 33.00 ((CH<sub>3</sub>)<sub>3</sub>CCC), 29.83 ((CH<sub>3</sub>)<sub>3</sub>CCC), 20.94, 20.88, 20.79, 20.68, 20.46, 20.31, 15.05, 14.83, 13.56, 12.98, 9.36, 8.75; <sup>29</sup>Si{<sup>1</sup>H}-NMR δ(C<sub>6</sub>D<sub>6</sub>): 1.61, 1.85, 2.28, 3.22 (Si<sup>i</sup>Pr<sub>3</sub>). Elemental Analysis: Calcd for C<sub>65</sub>H<sub>114</sub>N<sub>2</sub>Si<sub>4</sub>Ti<sub>2</sub>: C 66.98, H 10.15, N 2.48; Found: C 66.84, H 9.73, N 2.25; No molecular ion could be observed in EI.

**Preparation of (7-D):** In a similar manner to (**7**) starting from 25 mg (ca 0.024 mmol) of (**3**) and 3 μL (1 mol eq) of <sup>t</sup>BuCCD in C<sub>6</sub>H<sub>6</sub> with a few drops of C<sub>6</sub>D<sub>6</sub> for <sup>2</sup>H NMR or in C<sub>6</sub>D<sub>6</sub> for full characterization.

**Preparation of (9):** A Young's ampule was charged in a N<sub>2</sub> filled glovebox with 28 mg (0.0266 mmol) of (**3**), which was subsequently dissolved in 5 mL of Et<sub>2</sub>O with stirring and cooled at 0 °C using an ice bath. To this 13.3 μL of a 2.0 M HCl solution in Et<sub>2</sub>O (1 mol eq.) were added in one go via a microsyringe under a current of Ar and the reaction mixture was allowed to stir at this temperature for ca 5 minutes. The ice bath was then removed and after 10 minutes volatiles were removed and the dark green film was dried in vacuum to give the title compound in 100 % spectroscopic yield as judged by NMR spectroscopy in C<sub>6</sub>D<sub>6</sub>. C<sub>6</sub>D<sub>6</sub> was then removed via lyophilization and the residue was extracted in an Ar filled glovebox with n-pentane (ca 2 mL), filtered, the volume reduced at ambient temperature to ca half and finally refrigerated (-35 °C) to furnish the title compound as dichroic green brown needles. Yield: 20 mg (64.5%) <sup>1</sup>H-NMR δ(C<sub>6</sub>D<sub>6</sub>): 7.73 (1H, d, <sup>3</sup>J<sub>HH</sub> = 3.44 Hz, PnH), 7.50 (1H, d, <sup>3</sup>J<sub>HH</sub> = 2.95 Hz, PnH), 7.47 (1H, d, <sup>3</sup>J<sub>HH</sub> = 2.90 Hz, PnH), 6.90 (1H, d, <sup>3</sup>J<sub>HH</sub> = 3.20 Hz, PnH), 6.65 (1H, d, <sup>3</sup>J<sub>HH</sub> = 3.02 Hz, PnH), 6.47 (1H, d, <sup>3</sup>J<sub>HH</sub> = 3.40 Hz, PnH), 5.82 (1H, d, <sup>3</sup>J<sub>HH</sub> = 2.95 Hz, PnH), 5.42 (1H, d, <sup>3</sup>J<sub>HH</sub> = 3.10 Hz, PnH), 4.08 (3H, s, NCH<sub>3</sub>), 1.70-0.95 (m, 93H, CH(CH<sub>3</sub>)<sub>2</sub> CH(CH<sub>3</sub>)<sub>2</sub> and CH<sub>3</sub> of ylidene) -8.6 (1H, s, TiHTi); <sup>13</sup>C{<sup>1</sup>H}-NMR δ(C<sub>6</sub>D<sub>6</sub>): 195.13 (NCN), 138.13 (CH, Pn), 136.71 (q) 134.68 (q), 133.43 (CH, Pn), 126.95 (CH, Pn), 125.54 (CH, Pn), 126.39 (q), 125.04 (q), 129.07 (q), 120.07 (CH, Pn) 119.36 (q),

116.92 (q), 110.94 (q), 107.30 (CH, Pn), 105.19 (CH, Pn), 103.27 (CH, Pn), 97.47 (q), 94.74 (q), 38.62 (NCH<sub>3</sub>), 34.76 (NCH<sub>3</sub>), 20.55, 20.45, 20.38, 20.27, 20.16, 20.05, 19.89, 14.67, 14.37, 13.21, 12.92, 8.97, 8.44 (CH(CH<sub>3</sub>)<sub>2</sub> and CH(CH<sub>3</sub>)<sub>2</sub>); <sup>29</sup>Si{<sup>1</sup>H}-NMR δ(C<sub>6</sub>D<sub>6</sub>): 3.27, 2.61, 2.13 and 2.01 (SiPr<sub>3</sub>); Elemental Analysis: Calcd for C<sub>59</sub>H<sub>105</sub>ClN<sub>2</sub>Si<sub>4</sub>Ti<sub>2</sub>: C 65.25 H 9.75 N 2.58; Found C 65.17, H 9.66, N 2.22; No molecular ion could be observed in EI

**Preparation of (10):** In an Ar filled glovebox 50 mg (0.048 mmol) of (3) were combined with 20 mg of [NEt<sub>3</sub>H]BPh<sub>4</sub> (1 mol eq) in a Young's ampule and benzene (*ca* 5 mL) was added at RT. After *ca* 10 minutes stirring at RT volatiles were removed and the dark turquoise residue dried extensively. NMR spectroscopy (C<sub>7</sub>D<sub>8</sub>) showed that (10) is produced in 100 % spectroscopic yield. Layering this toluene solution (*ca* 1 mL) with n-heptane and leaving undisturbed for 1 week produces crystals (20 mg) suitable for XRD of the title compound along with an oily residue which can be separated from the crystals with a drawn-out pipette. The latter can be separated from its mother-liquor *via* careful decantation, washed with n-pentane, and dried in vacuum to produce a turquoise film that is of the same purity as the crystalline material. Combined yield: 43 mg (*ca* 68%) <sup>1</sup>H-NMR δ(C<sub>7</sub>D<sub>8</sub>): 7.92 (8H, broad B(C<sub>6</sub>H<sub>5</sub>)<sub>4</sub><sup>-</sup>), 7.50 (1H, d, <sup>3</sup>J<sub>HH</sub> = 3.07 Hz, PnH), 7.38 (1H, d, <sup>3</sup>J<sub>HH</sub> = 2.63 Hz, PnH), 7.25 (8H, virtual t, B(C<sub>6</sub>H<sub>5</sub>)<sub>4</sub><sup>-</sup>), 7.13 (1H, d, <sup>3</sup>J<sub>HH</sub> = 3.29 Hz, PnH), 7.10 (4H, virtual t, B(C<sub>6</sub>H<sub>5</sub>)<sub>4</sub><sup>-</sup>), 7.01 (1H, broad s, PnH), 6.47 (1H, d, <sup>3</sup>J<sub>HH</sub> = 3.07 Hz, PnH), 5.93 (1H, d, <sup>3</sup>J<sub>HH</sub> = 2.85 Hz, PnH), 5.82 (1H, d, <sup>3</sup>J<sub>HH</sub> = 3.29 Hz, PnH), 5.75 (1H, d, <sup>3</sup>J<sub>HH</sub> = 3.07 Hz, PnH), 3.57 (3H, s, NCH<sub>3</sub>), 1.48 (3H, s, NCH<sub>3</sub>), 1.42-1.31 (6H, m, CH(CH<sub>3</sub>)<sub>2</sub>), 1.22-1.15 (13H m), 1.1-0.98 (50H, m, CH(CH<sub>3</sub>)<sub>2</sub>), 0.97-0.9 (6H, m, CH(CH<sub>3</sub>)<sub>2</sub>), 0.86 (3H, br s, CH(CH<sub>3</sub>)<sub>2</sub>), 0.71 (6H, d, <sup>3</sup>J<sub>HH</sub> = 7.24 Hz, CH(CH<sub>3</sub>)<sub>2</sub>), 0.22 (6H, d, <sup>3</sup>J<sub>HH</sub> = 7.23 Hz, CH(CH<sub>3</sub>)<sub>2</sub>), -5.72 (1H, s, TiHTi); <sup>13</sup>C{<sup>1</sup>H}-NMR δ(C<sub>7</sub>D<sub>8</sub>): 185.41 (NCN), 165.23 (q, B(C<sub>6</sub>H<sub>5</sub>)<sub>4</sub><sup>-</sup>, <sup>1</sup>J<sub>BC</sub> = 49.6 Hz), 140.67 (q), 139.19 (q), 137.20 (B(C<sub>6</sub>H<sub>5</sub>)<sub>4</sub><sup>-</sup>), 136.75 (CH, Pn), 134.07 (CH, Pn), 133.79 (CH, Pn), 133.64 (CH, Pn), 129.14 (CH, Pn, located by DEPT 135), 128.21 (CH, Pn, located by DEPT 135), 125.89 (B(C<sub>6</sub>H<sub>5</sub>)<sub>4</sub><sup>-</sup>), 121.89 (B(C<sub>6</sub>H<sub>5</sub>)<sub>4</sub>), 121.62 (q), 117.48 (q), 116.15 (q), 112.44 (CH, Pn), 112.24 (CH, Pn), 111.25 (q), 106.74 (CH, Pn), 105.52 (CH, Pn), 104.12 (q), 100.66 (q), 37.64 (NCH<sub>3</sub>), 34.50, 33.83, 22.75, 19.99, 19.97, 19.79, 19.56, 19.52, 18.52, 17.35, 14.39, 14.23, 14.19, 14.14, 13, 8.88, 8.40 (CH(CH<sub>3</sub>)<sub>2</sub> and NHC CH<sub>3</sub>); <sup>29</sup>Si{<sup>1</sup>H}-NMR δ(C<sub>7</sub>D<sub>8</sub>): 4.31, 4.14, 4.03, 3.73 (SiPr<sub>3</sub>); <sup>11</sup>B{<sup>1</sup>H}-NMR δ(C<sub>7</sub>D<sub>8</sub>): -6.75 (B(C<sub>6</sub>H<sub>5</sub>)<sub>4</sub><sup>-</sup>); IR (thin film): 2753 cm<sup>-1</sup> (agostic C-H); Elemental Analysis: Calcd for C<sub>97</sub>H<sub>157</sub>BN<sub>2</sub>Si<sub>4</sub>Ti<sub>2</sub> (10).C<sub>7</sub>H<sub>16</sub>: C 73.54, H 9.67, N 1.92; Found C 73.67, H 9.30 N 1.95; No molecular ion could be observed in ESI<sup>+</sup>

**X-ray Crystallography:** Data for all compounds were collected using an Agilent Gemini Ultra diffractometer using with an Enhance Ultra (Cu K $\alpha$ ), equipped with an Eos CCD area detector, operating in  $\omega$  scanning mode to fill the Ewald sphere. All collections were carried out at 173 K. Control, integration and absorption correction were handled by the CrysAlis<sup>Pro</sup> software. The crystals were mounted on MiTiGen loops, from dried vacuum oil kept over 4Å in an MBraun glovebox under Ar. All solutions and refinements were performed using the WinGX package and all software packages within. All non-hydrogen atoms were refined using anisotropic thermal parameters, and hydrogens were added using a riding model, except in the case of the Ti-H bonds that were found in the difference map and refined freely. In the case of (7), twinning was handled from the CrysAlis<sup>Pro</sup> software suite that produced the .hkl4 reflection file which was used for the refinement of the model. In the case of (10) the hydrogen atoms on carbon atom C9 were found in the difference map and refined freely. Crystal structure, data collection and refinement details are given in the following table of this Supporting Information.

In the case of (5) and (9) data were collected on a Rigaku FR-E rotating Cu K $\alpha$  anode at 100K equipped with a Saturn 724+ CCD area detector. The brown-green dichroic crystals of (9) were found to have high mosaicity (4°) on one direction, thus hindering the acquisition of data with the desired resolution. Our efforts were further hampered by decomposition of the crystals upon extended exposures (the best crystals were found to be very thin needles). Nevertheless,

connectivity could be established and the data-set could be solved from the ‘What is this’ pre-experiment routine in CrysAlis Pro. Although these data do not provide the level of confidence regarding bond lengths and angles, they completely agree with our spectroscopic and analytical data. The structure contains large solvent accessible voids although no crystallisation solvent could be located and hints as to the high mosaicity of the crystals. Parameters of this pre-collection experiment, along with information regarding refinement details are provided in reference 32 of the main text. In the case of **(5)** data were collected to a resolution of 0.9 Å. All this data is available free of charge at the Cambridge Crystallographic Database depository with the following codes: **(5)**: CCDC-1861427 **(6)**: CCDC-1850106; **(7)**: CCDC-1850107; **(9)**: CCDC-1850109; **(10)**: CCDC-1850108.

| Compound                                        | <b>5</b>                                                                                               | <b>6</b>                                                                         | <b>7</b>                                                                        | <b>10</b>                                                                                                                                                       |
|-------------------------------------------------|--------------------------------------------------------------------------------------------------------|----------------------------------------------------------------------------------|---------------------------------------------------------------------------------|-----------------------------------------------------------------------------------------------------------------------------------------------------------------|
| Colour, Habit                                   | Light Brown, Plate                                                                                     | Dark Orange, Plate                                                               | Green, Plate                                                                    | Green, Block                                                                                                                                                    |
| Size/mm                                         | 0.08 x 0.08 x 0.01                                                                                     | 0.08 x 0.05 x 0.01                                                               | 0.08 x 0.1 x 0.2                                                                | 0.3 x 0.3 x 0.1                                                                                                                                                 |
| Empirical Formula                               | C <sub>57</sub> H <sub>97</sub> NSi <sub>4</sub> Ti <sub>2</sub> · ½<br>C <sub>5</sub> H <sub>12</sub> | C <sub>57</sub> H <sub>95</sub> Cl <sub>2</sub> NSi <sub>4</sub> Ti <sub>2</sub> | C <sub>65</sub> H <sub>114</sub> N <sub>2</sub> Si <sub>4</sub> Ti <sub>2</sub> | C <sub>81</sub> H <sub>121</sub> BN <sub>2</sub> Si <sub>4</sub> Ti <sub>2</sub><br>.0569 C <sub>7</sub> H <sub>16</sub> .0431<br>C <sub>7</sub> H <sub>8</sub> |
| M                                               | 1040.58                                                                                                | 1073.39                                                                          | 1131.69                                                                         | 1368.80                                                                                                                                                         |
| Crystal System                                  | Triclinic                                                                                              | Monoclinic                                                                       | Monoclinic                                                                      | Monoclinic                                                                                                                                                      |
| Space Group                                     | <i>P</i> -1                                                                                            | <i>P</i> 2 <sub>1</sub> / <i>n</i>                                               | <i>P</i> 2 <sub>1</sub> / <i>c</i>                                              | <i>P</i> 2 <sub>1</sub> / <i>c</i>                                                                                                                              |
| <i>a</i> /Å                                     | 12.7393(6)                                                                                             | 13.5335(10)                                                                      | 17.0419(13)                                                                     | 21.4972(3)                                                                                                                                                      |
| <i>b</i> /Å                                     | 12.9078(8)                                                                                             | 29.979(2)                                                                        | 14.2566(11)                                                                     | 13.1075(2)                                                                                                                                                      |
| <i>c</i> /Å                                     | 21.1087(11)                                                                                            | 14.6437(12)                                                                      | 27.6286(16)                                                                     | 30.6056(5)                                                                                                                                                      |
| $\alpha^\circ$                                  | 77.484(5)                                                                                              | 90                                                                               | 90                                                                              | 90                                                                                                                                                              |
| $\beta^\circ$                                   | 87.578(4)                                                                                              | 95.841(7)                                                                        | 94.809(7)                                                                       | 95.6200(10)                                                                                                                                                     |
| $\gamma^\circ$                                  | 61.137(5)                                                                                              | 90                                                                               | 90                                                                              | 90                                                                                                                                                              |
| <i>V</i> / Å <sup>3</sup>                       | 2959.7(3)                                                                                              | 5910.4(8)                                                                        | 6689.0(8)                                                                       | 8582.4(2)                                                                                                                                                       |
| <i>Z</i>                                        | 2                                                                                                      | 4                                                                                | 4                                                                               | 4                                                                                                                                                               |
| $\mu$ /mm <sup>-1</sup>                         | 3.329                                                                                                  | 4.163                                                                            | 2.987                                                                           | 2.435                                                                                                                                                           |
| <i>T</i> (K)                                    | 100                                                                                                    | 173                                                                              | 173                                                                             | 173                                                                                                                                                             |
| $\theta$ min/max                                | 3.973/51.756                                                                                           | 4.232/68.251                                                                     | 3.961/67.079                                                                    | 3.393/ 67.076                                                                                                                                                   |
| Completeness                                    | 97.5 to 51.756                                                                                         | 99.0 to 68.251                                                                   | 98.2 to 67.079                                                                  | 99.5 to 67.076                                                                                                                                                  |
| Reflections<br>Total/Independent                | 6384/5407                                                                                              | 10719/6778                                                                       | 11727/5273                                                                      | 16184/13455                                                                                                                                                     |
| <i>R</i> <sub>int</sub>                         | 0.0404                                                                                                 | 0.0646                                                                           | 0.1048                                                                          | 0.0276                                                                                                                                                          |
| Final <i>R</i> 1 and <i>wR</i> 2                | 0.0562/0.1577                                                                                          | 0.0707/0.1737                                                                    | 0.0793/0.2566                                                                   | 0.0549/0.1616                                                                                                                                                   |
| Goof                                            | 1.027                                                                                                  | 1.075                                                                            | 0.898                                                                           | 1.025                                                                                                                                                           |
| Largest peak hole/<br><i>e</i> .Å <sup>-3</sup> | 0.52 and -0.48                                                                                         | 0.5 and -0.4                                                                     | 0.66 and -1.12                                                                  | 1.0 and -0.42                                                                                                                                                   |
| $\rho$ <sub>calc</sub> /g.cm <sup>-3</sup>      | 1.168                                                                                                  | 1.206                                                                            | 1.124                                                                           | 1.135                                                                                                                                                           |

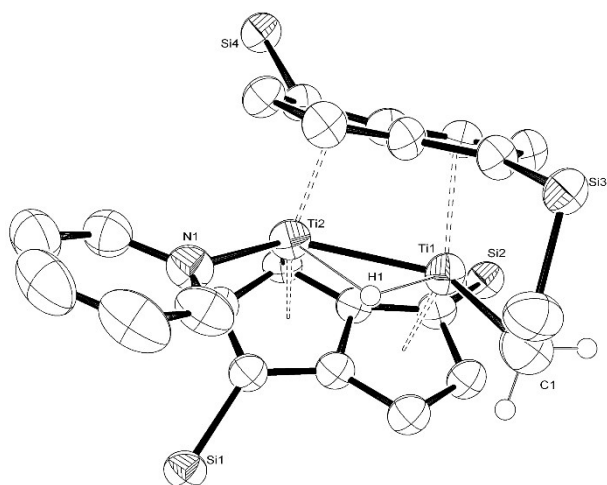

Molecular structure of (**5**) showing 50% probability ellipsoids. <sup>i</sup>Pr and H atoms (except the bridging hydride and the hydrogens on the cyclo-metallated <sup>i</sup>Pr group (atom C1)) have been removed for clarity. Selected bond lengths (Å) and angles (°): C1-Ti1: 2.243(5), Ti1-Ti2: 2.5362(11), Ti1-H1: 1.82(3), Ti2-H1: 1.91(4), N1-Ti2: 2.266(3); N1-Ti2-Ti1: 129.15(10), N1-Ti2-H1: 83.6(10), Ti1-Ti2-H1: 45.5(10), Ti1-H1-Ti2: 85.8(18), C1-Ti1-H1: 75.4(11)

**Computational Details:** Density functional calculations were carried using the Amsterdam Density Functional package (version ADF2016.107).<sup>iv</sup> The Slater-type orbital (STO) basis sets were of triple- $\zeta$  quality augmented with a one polarization function (ADF basis TZP). Core electrons were frozen (C, N 1s; Ti 2p) in the model of the electronic configuration for each atom. The local density approximation (LDA) by Vosko, Wilk and Nusair (VWN)<sup>v</sup> was used together with the exchange correlation corrections of Becke and Perdew (BP86).<sup>vi,vii</sup> Local minima and transition states were confirmed by frequency calculations.

### Cartesian coordinates for optimised structures.

H<sub>2</sub>

|   |             |            |            |
|---|-------------|------------|------------|
| H | -3.58553509 | 4.51453437 | 1.87556790 |
| H | -3.12634177 | 3.97014110 | 1.63679021 |

3

|   |            |             |             |
|---|------------|-------------|-------------|
| C | 0.83011677 | 0.96303980  | 0.82833386  |
| C | 1.34089322 | 0.42486982  | -0.42161795 |
| C | 1.55446477 | 1.52743717  | -1.32533549 |
| C | 1.29531005 | 2.71784788  | -0.59286281 |
| C | 0.76761254 | 2.40082055  | 0.69490697  |
| C | 1.48309736 | -0.99960278 | -0.25766878 |
| C | 0.67477809 | -0.14081366 | 1.75553397  |
| C | 1.16936372 | -1.30863507 | 1.09923305  |
| H | 1.93337060 | 1.47599046  | -2.34003861 |
| H | 1.41939209 | 3.72516049  | -0.98683587 |
| H | 0.51741983 | 3.11505595  | 1.47225595  |
| H | 1.87906937 | -1.69598856 | -0.99032454 |
| H | 0.40806918 | -0.06995107 | 2.80475510  |
| H | 1.27662313 | -2.28948717 | 1.55880455  |

|    |             |             |             |
|----|-------------|-------------|-------------|
| C  | -2.47948715 | 1.04336584  | 0.80713733  |
| C  | -2.99994660 | 0.53524534  | -0.45139619 |
| C  | -3.14531251 | 1.64982981  | -1.35394400 |
| C  | -2.83523727 | 2.82339543  | -0.61398172 |
| C  | -2.34216254 | 2.47636604  | 0.67959090  |
| C  | -3.21561050 | -0.88088878 | -0.29418351 |
| C  | -2.39269114 | -0.06958948 | 1.73276137  |
| C  | -2.93653351 | -1.20915153 | 1.06565093  |
| C  | -0.89147581 | -2.35692020 | -1.37021305 |
| H  | -2.90234409 | 3.83685118  | -1.00628677 |
| H  | -2.06518952 | 3.17459068  | 1.46244934  |
| H  | -3.63433507 | -1.55490091 | -1.03503849 |
| H  | -2.13849092 | -0.01474169 | 2.78602727  |
| H  | -3.09925795 | -2.18474628 | 1.52000163  |
| Ti | -0.79756343 | 1.64618026  | -0.87270091 |
| Ti | -0.86137113 | -0.66158760 | 0.08408932  |
| H  | -0.95324965 | -5.47888821 | -2.50957229 |
| H  | -0.89179026 | -3.51927412 | -4.47919894 |
| H  | -0.94176180 | -4.15685299 | -0.30685596 |
| N  | -0.87730100 | -2.22243365 | -2.72801000 |
| C  | -0.89911816 | -3.43614024 | -3.39916969 |
| C  | -0.92928619 | -4.39845598 | -2.43395707 |
| N  | -0.92361339 | -3.71682794 | -1.22034674 |
| H  | -0.85213397 | -1.28928929 | -3.13934015 |
| H  | -3.51287511 | 1.62101303  | -2.37370869 |
| H  | -0.83353833 | 0.01939775  | -1.59499020 |
| H  | -0.78400459 | 1.75351555  | -2.62109899 |

## TS1

|   |             |             |             |
|---|-------------|-------------|-------------|
| C | 0.86362200  | 0.81625200  | 0.89198900  |
| C | 1.39479200  | 0.32844100  | -0.36795200 |
| C | 1.58045100  | 1.47815200  | -1.22816100 |
| C | 1.32635200  | 2.63851400  | -0.45242500 |
| C | 0.75146500  | 2.25909800  | 0.79697500  |
| C | 1.45962700  | -1.09104400 | -0.30559600 |
| C | 0.61821700  | -0.31577200 | 1.73293700  |
| C | 1.01433300  | -1.50501800 | 1.01133200  |
| H | 1.99920200  | 1.47305100  | -2.23171700 |
| H | 1.51361200  | 3.65826700  | -0.76974100 |
| H | 0.51982500  | 2.94228300  | 1.60846500  |
| H | 1.84102700  | -1.74986800 | -1.08003500 |
| H | 0.30281600  | -0.29137900 | 2.77041900  |
| H | 1.17860600  | -2.48273200 | 1.45740900  |
| C | -2.43257500 | 1.06259600  | 0.76786900  |
| C | -3.00072600 | 0.56895600  | -0.47206200 |
| C | -3.21176400 | 1.70439600  | -1.33590400 |
| C | -2.92031800 | 2.87447500  | -0.58118800 |
| C | -2.35132600 | 2.50662700  | 0.67580200  |
| C | -3.18100900 | -0.85027000 | -0.34022400 |
| C | -2.29917100 | -0.06454200 | 1.67132800  |

|    |             |             |             |
|----|-------------|-------------|-------------|
| C  | -2.85890200 | -1.19961500 | 1.00921100  |
| C  | -0.86097800 | -2.37691800 | -1.39614800 |
| H  | -3.05063700 | 3.89382600  | -0.93255400 |
| H  | -2.06730300 | 3.19434700  | 1.46499400  |
| H  | -3.62178800 | -1.51592700 | -1.07574800 |
| H  | -2.03045100 | -0.01522800 | 2.72013900  |
| H  | -3.01666100 | -2.17807300 | 1.45623600  |
| Ti | -0.85500900 | 1.85149000  | -0.93739300 |
| Ti | -0.80785800 | -0.63085800 | -0.02277500 |
| H  | -0.50642600 | -5.58039900 | -2.21184000 |
| H  | -1.23151600 | -3.92138100 | -4.31773800 |
| H  | -0.34111600 | -3.98244500 | -0.18530200 |
| N  | -1.14360000 | -2.42147800 | -2.73444400 |
| C  | -1.04535000 | -3.69854600 | -3.27399100 |
| C  | -0.68850000 | -4.51287300 | -2.24037000 |
| N  | -0.59096100 | -3.68947700 | -1.12469300 |
| H  | -1.35947500 | -1.57256600 | -3.24770700 |
| H  | -3.62329900 | 1.68931000  | -2.34199400 |
| H  | -0.82467100 | 0.22370500  | -1.72071600 |
| H  | -0.61459200 | 3.50646800  | -1.55673900 |
| H  | -0.71140300 | 2.26497300  | -3.69531100 |
| H  | -0.73915400 | 1.53715100  | -3.47003900 |

## INT

|   |             |             |             |
|---|-------------|-------------|-------------|
| C | 0.87576600  | 0.81617500  | 0.89034500  |
| C | 1.39230400  | 0.32532600  | -0.37401600 |
| C | 1.57357600  | 1.47494100  | -1.24112000 |
| C | 1.32339000  | 2.63551100  | -0.45979900 |
| C | 0.75764300  | 2.25674000  | 0.79091700  |
| C | 1.45674400  | -1.09520900 | -0.30411600 |
| C | 0.63714100  | -0.31098600 | 1.73837600  |
| C | 1.02300800  | -1.50298400 | 1.01809500  |
| H | 2.01721900  | 1.46938800  | -2.23352100 |
| H | 1.51461500  | 3.65603500  | -0.77336200 |
| H | 0.51655200  | 2.94205600  | 1.59789600  |
| H | 1.83191500  | -1.75949900 | -1.07703700 |
| H | 0.32713700  | -0.28126900 | 2.77749100  |
| H | 1.18164100  | -2.48139000 | 1.46419500  |
| C | -2.43390400 | 1.06189400  | 0.76191000  |
| C | -2.99556300 | 0.55066200  | -0.47423600 |
| C | -3.21444500 | 1.67731000  | -1.35164900 |
| C | -2.93315300 | 2.85518100  | -0.60313400 |
| C | -2.36303900 | 2.50361500  | 0.65477200  |
| C | -3.17175900 | -0.86781900 | -0.32303400 |
| C | -2.29251300 | -0.05317400 | 1.67756800  |
| C | -2.84499700 | -1.20225700 | 1.02878800  |
| C | -0.86283400 | -2.36171100 | -1.39708000 |
| H | -3.07395400 | 3.87154700  | -0.95984100 |
| H | -2.07685900 | 3.20234200  | 1.43355000  |
| H | -3.60781800 | -1.54388600 | -1.05198400 |



|    |             |             |             |
|----|-------------|-------------|-------------|
| H  | -2.02200300 | 0.01060800  | 2.72526100  |
| H  | -3.00066500 | -2.17492100 | 1.48873900  |
| Ti | -0.85453800 | 1.83434600  | -0.96882400 |
| Ti | -0.80628100 | -0.62575700 | -0.00865200 |
| H  | -0.60135000 | -5.57490700 | -2.20700900 |
| H  | -1.16415400 | -3.88422500 | -4.33709700 |
| H  | -0.45786600 | -3.98696700 | -0.17008700 |
| N  | -1.08721000 | -2.39168100 | -2.74606600 |
| C  | -1.01634300 | -3.67084000 | -3.28533600 |
| C  | -0.73927100 | -4.50096500 | -2.24007400 |
| N  | -0.65740100 | -3.68361400 | -1.11828900 |
| H  | -1.25094500 | -1.53333000 | -3.26341000 |
| H  | -3.64993100 | 1.65150400  | -2.34697900 |
| H  | -0.82149400 | 0.21623800  | -1.72775300 |
| H  | -0.63401700 | 3.55989500  | -1.43364800 |
| H  | -0.73672900 | 2.49455300  | -2.79085600 |
| H  | -0.79330600 | 1.69215700  | -2.90842700 |

## TS2

|    |             |             |             |
|----|-------------|-------------|-------------|
| C  | 0.82813800  | 0.89607500  | 0.83737300  |
| C  | 1.36202900  | 0.38932400  | -0.41343400 |
| C  | 1.59387200  | 1.53138300  | -1.27518500 |
| C  | 1.35941800  | 2.70064800  | -0.49945000 |
| C  | 0.77659800  | 2.33966900  | 0.74876200  |
| C  | 1.44819100  | -1.03417400 | -0.31262600 |
| C  | 0.60326700  | -0.22794300 | 1.70946900  |
| C  | 1.05514800  | -1.41085200 | 1.02366500  |
| H  | 2.03611100  | 1.51332100  | -2.26781900 |
| H  | 1.55041400  | 3.71818900  | -0.82606700 |
| H  | 0.52975500  | 3.03096000  | 1.54797900  |
| H  | 1.84381700  | -1.70748600 | -1.06705400 |
| H  | 0.31116900  | -0.17945900 | 2.75248300  |
| H  | 1.20589200  | -2.38711400 | 1.47598500  |
| C  | -2.46229100 | 0.99229000  | 0.80046000  |
| C  | -3.00202300 | 0.51207700  | -0.45820800 |
| C  | -3.16641400 | 1.66345300  | -1.32219700 |
| C  | -2.88655500 | 2.82027800  | -0.54237700 |
| C  | -2.34328000 | 2.43190800  | 0.71548300  |
| C  | -3.16594000 | -0.90572000 | -0.35572900 |
| C  | -2.31543200 | -0.14155800 | 1.67964200  |
| C  | -2.82475600 | -1.29553100 | 0.98888600  |
| C  | -0.88315300 | -2.37531900 | -1.39893800 |
| H  | -3.01905100 | 3.84585700  | -0.87331400 |
| H  | -2.07236100 | 3.10998800  | 1.51808000  |
| H  | -3.58428700 | -1.55992000 | -1.11460900 |
| H  | -2.04229100 | -0.10623600 | 2.72820600  |
| H  | -3.02388700 | -2.26575900 | 1.43536900  |
| Ti | -0.78710700 | 1.82752200  | -0.94401600 |
| Ti | -0.84911400 | -0.62672500 | -0.02050300 |
| H  | -0.90649200 | -5.61390300 | -2.14932400 |

|   |             |             |             |
|---|-------------|-------------|-------------|
| H | -0.95998400 | -3.91452500 | -4.34550700 |
| H | -0.85666400 | -4.00949000 | -0.12009400 |
| N | -0.91768800 | -2.40832500 | -2.76604000 |
| C | -0.93248600 | -3.69789100 | -3.28429400 |
| C | -0.90614500 | -4.53212500 | -2.20660100 |
| N | -0.87828100 | -3.70553100 | -1.08873600 |
| H | -0.92588600 | -1.54757400 | -3.30512000 |
| H | -3.59151600 | 1.66687400  | -2.32242400 |
| H | -0.81628300 | 0.23033900  | -1.73577800 |
| H | -0.72180500 | 3.58083900  | -1.40149500 |
| H | -0.74652000 | 2.54125800  | -2.73325900 |
| H | -0.76913500 | 1.73727800  | -2.87670600 |

## 10

|    |             |             |             |
|----|-------------|-------------|-------------|
| C  | 10.39722577 | -1.33506048 | 19.76269913 |
| C  | 13.18315022 | 1.06446157  | 20.88767541 |
| C  | 12.79334318 | 0.45179187  | 19.64927598 |
| C  | 12.00477620 | 1.40312979  | 18.93995895 |
| H  | 11.63168799 | 1.26648168  | 17.92696902 |
| C  | 11.74607630 | 2.53505669  | 19.76140500 |
| H  | 11.22243931 | 3.43429931  | 19.45543524 |
| C  | 12.53325932 | 2.36226519  | 20.96258012 |
| C  | 13.00427394 | 3.02447906  | 22.15965164 |
| C  | 13.96381238 | 2.15902116  | 22.76507948 |
| H  | 14.56080522 | 2.40267936  | 23.64146497 |
| C  | 13.99779015 | 0.91512011  | 22.06724425 |
| H  | 14.62874005 | 0.06638866  | 22.31667500 |
| C  | 10.38629116 | 2.94601297  | 23.49459018 |
| H  | 10.65107073 | 3.99731902  | 23.46297826 |
| C  | 10.47959331 | 2.09800260  | 24.63308950 |
| H  | 10.90568445 | 2.40237648  | 25.58712121 |
| C  | 9.97538790  | 0.77705492  | 24.34336071 |
| C  | 9.40923178  | 0.87740994  | 23.00863036 |
| C  | 9.67745728  | 2.20545314  | 22.48003364 |
| C  | 9.05006333  | 2.31474822  | 21.18132624 |
| C  | 8.34083074  | 1.09552628  | 20.97775134 |
| H  | 7.67377788  | 0.89546365  | 20.14338749 |
| C  | 8.64569763  | 0.16938252  | 22.01001139 |
| H  | 8.26046879  | -0.84224865 | 22.08343088 |
| H  | 11.99955785 | -5.05434883 | 18.92105735 |
| H  | 9.10429052  | 0.46288981  | 18.38046717 |
| C  | 11.91887063 | -2.28145302 | 26.91283836 |
| H  | 11.25669506 | -2.37311145 | 27.78511324 |
| Si | 9.88279188  | -0.60494657 | 25.65753364 |
| H  | 12.95386760 | -2.37138910 | 27.27780413 |
| Ti | 10.68769044 | 0.69403916  | 20.78774056 |
| H  | 13.13525811 | -0.50036709 | 19.25826929 |
| C  | 9.60572342  | -2.87621066 | 18.24182693 |
| N  | 10.94837001 | -2.57237129 | 19.97691927 |
| H  | 11.43141634 | -0.31794929 | 22.09947537 |

|    |             |             |             |
|----|-------------|-------------|-------------|
| H  | 11.72745770 | -3.14431219 | 26.25899803 |
| H  | 11.67192823 | -3.72542616 | 21.58620872 |
| H  | 8.94751308  | 3.21671715  | 20.58740057 |
| H  | 8.95669918  | -4.44513068 | 16.95245240 |
| N  | 9.58139501  | -1.54675261 | 18.67925055 |
| Ti | 11.83500834 | 1.21581961  | 22.97037216 |
| C  | 10.47900881 | -3.52902497 | 19.06884779 |
| C  | 8.96650154  | -2.11860170 | 24.91169504 |
| H  | 8.07338949  | -1.66918530 | 24.43813712 |
| C  | 9.75296811  | -2.85273336 | 23.81168654 |
| H  | 10.10016772 | -2.17056541 | 23.02344512 |
| H  | 9.12690804  | -3.62582627 | 23.33666981 |
| H  | 10.63424547 | -3.36523188 | 24.22606259 |
| C  | 8.45867471  | -3.12011913 | 25.96912033 |
| H  | 7.81311084  | -2.64637831 | 26.72018575 |
| H  | 9.28781627  | -3.60727457 | 26.50199299 |
| H  | 7.86989939  | -3.91684607 | 25.48790514 |
| C  | 9.51700481  | 1.17378281  | 27.95818823 |
| H  | 10.54156035 | 0.94605659  | 28.28508794 |
| H  | 8.92827611  | 1.38732697  | 28.86388956 |
| H  | 9.54208216  | 2.10429971  | 27.37230747 |
| C  | 8.87276902  | 0.02439503  | 27.16203209 |
| H  | 8.82528159  | -0.85227823 | 27.83499228 |
| C  | 7.42999392  | 0.39021195  | 26.76074225 |
| H  | 6.90430745  | -0.43976824 | 26.26766503 |
| H  | 7.41683555  | 1.24891549  | 26.07261188 |
| H  | 6.84000684  | 0.67138657  | 27.64666667 |
| C  | 12.68822837 | -0.80035111 | 24.99656838 |
| H  | 12.78190323 | 0.27571748  | 24.70656178 |
| H  | 12.40421292 | -1.40868568 | 24.12587451 |
| H  | 13.71619216 | -1.08509070 | 25.27437156 |
| C  | 11.70837905 | -0.94439326 | 26.17548220 |
| H  | 11.95206173 | -0.13990138 | 26.89224945 |
| H  | 12.81329568 | 4.05165411  | 22.44855033 |
| H  | 12.92047495 | -3.15008127 | 20.44563930 |
| C  | 8.79932224  | -3.36926144 | 17.08951685 |
| H  | 7.72184290  | -3.20821547 | 17.24332533 |
| H  | 9.07939836  | -2.87315730 | 16.14773946 |
| C  | 8.81246602  | -0.51662461 | 17.99011363 |
| H  | 9.02593731  | -0.54632697 | 16.91421055 |
| H  | 7.73395212  | -0.66097582 | 18.14020817 |
| C  | 10.91686087 | -4.95385839 | 19.09042748 |
| H  | 10.68380720 | -5.43949601 | 20.04989096 |
| H  | 10.40570205 | -5.51813936 | 18.30212720 |
| C  | 11.98423440 | -2.88446773 | 20.95550928 |
| H  | 12.14194287 | -2.00013174 | 21.57894451 |

<sup>i</sup> A. F. R. Kilpatrick, J. C. Green, F. G. N. Cloke and N. Tsoureas, *Chem. Commun.*, 2013, **49**, 9434.

<sup>ii</sup> N. Tsoureas, J. C. Green and F. G. N. Cloke, *Chem. Commun.*, 2017, **53**, 13117.

<sup>iii</sup> J. Wang, D. K. Aswini, K. Moshe, J.-C. Berthet, M. Ephritikhine and M. S. Eisen, *Chem. Eur. J.*, 2002, **8**, 5384.

<sup>iv</sup> SCM, *Amsterdam Density Functional (ADF)*, Theoretical Chemistry, Vrije Universiteit, Amsterdam, The

---

Netherlands, 2016.

<sup>v</sup> S. H. Vosko, L. Wilk and M. Nusair, *Can. J. Phys.*, 1980, **58**, 1200–1211.

<sup>vi</sup> A. Becke, *Phys. Rev., A*, 1988, **38**, 3098–3100.

<sup>vii</sup> J. P. Perdew, *Phys. Rev. B*, 1986, **33**, 8822–8824.
